# Supplementary material
Source: publisher figshare collection journal article supplement (https://frontiersin.figshare.com/ndownloader/files/29806407)
Supplement: Supplementary file 1 [file 29806407]

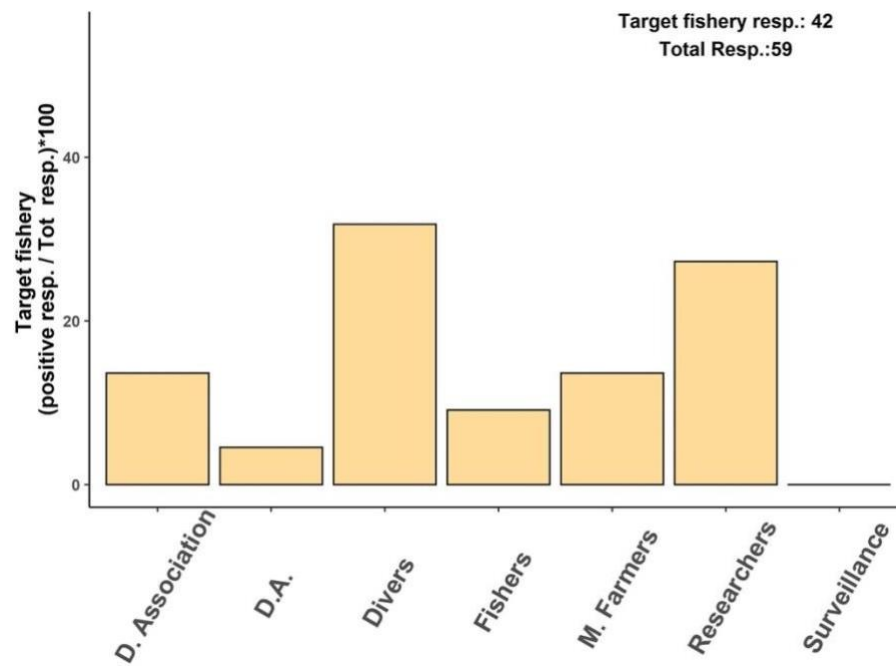

**Supplementary Materials – Figure S3** - Percentage of positive responses among respondent categories on presence of target fisheries. D. Association = Disclosure association; D.A. = do not answer; M. Farmers = Mussel farmers.
